# Supplementary material
Source: publisher site journal article supplement (https://www.dovepress.com/article/472172)
Supplement: Supplementary file 1 [file get_supplementary_file.php]

| **Read** | **reference strain** | **Location** | **Sequence (5′→3′)** | **Sequence identity,**  **no./No. (%)** |
| --- | --- | --- | --- | --- |
| 1 | CP029501.1 | 162899-162974 | GCCGCATCGCCGACGCCGCTGCAACTCGTACCAGACAATACCACCCATCACCCCCACCATCCCGACTCCGTGCAGC | 75/76 (99%) |
| 2 | CP029517.1 | 653518-653593 | CCTGACAAGGCAACGGTGACGACGTCAGCTAGAAGGGCGAGCGGCGGCGGGACGACGCCGTGCTCAGAATTTCCTG | 76/76 (100%) |
| 3 | CP029519.1 | 351398-351473 | TTCGGAACGGCGTCGACGATCGCCGCGAAGGTGCGCTCGGTGGATGAACGAATGCACTTCATGGCCGTAAAGCGGT | 76/76 (100%) |
| 4 | CP029514.1 | 314196-314271 | GCGCGTGAGGCCTCGAGGAAGATGGCAAGAAACCAGGCTCGACGGTCGGTGCGGCTGACCCCTGCAGCGAATGAGG | 76/76 (100%) |
| 5 | CP029515.1 | 57350-57425 | CAGAACAACGCACTGCGCACGTGCGCACGCAGGCGCACACGCGTAGTGTTCGGCACAACGATCGATCTTGCGCAGT | 76/76 (100%) |
| 6 | CP029515.1 | 390184-390259 | CTCTCTTCTCCGCTGCTTCGCTTGCTTCGTTCGTCTCTGTCCCTTTGCTGCGCCGCACACCGGAACACAGAGGGCT | 76/76 (100%) |

**Table S1.** 20 species-specific sequences reads of Leishmania donovani from results of metagenomic next-generation sequencing (mNGS) of the patient’s blood sample.

| 7 | CP029517.1 | 315227-315302 | GGGCGTACGAGTGACACGCTCGCGCGTGTGATAGTGCGCATGCGCATGCCTGGTTTTCCCATGTCCTTCTCTTCGG | 74/76 (97%) |
| --- | --- | --- | --- | --- |
| 8 | CP029522.1 | 519120-519195 | GGGAAAGGAGCAAAGCAGAATGGAGGTGAGCGGCAGAGATTCGCACGCAAGGGCCACACCGACAGAAGAAAGGACG | 75/76 (99%) |
| 9 | [CP029525.1](https://www.ncbi.nlm.nih.gov/nucleotide/CP029525.1?report=genbank&log$=nucltop&blast_rank=2&RID=05WGYZMD016) | 557796-557871 | CGATCTCTTATTGCAAAGATGGAGTGCGCTGACGGCCCGGTCACTGCCGCACCGACAGGCGCCCCGGCGAGCACGG | 69/76 (90.8%) |
| 10 | CP029535.1 | 2463978-2464053 | AGCGATGCGCGGGTACACGCCGTCCTCGTTGTACTGCCCCGGCACCACCAGCGAAAGGTCCTTGCCGCTCTGCATC | 76/76 (100%) |
| 11 | CP029530.1 | 671791-671866 | GGACGCGAAAAGCACGCGCTGCTATGCACACACAATGAATACACTCGAAAAAGAAACACGAACGGCAAATTGTTTG | 75/76(99%) |
| 12 | CP029531.1 | 217911-217986 | CCTCCCGCTCTCATCCTCAAGGATGGGCGGAAAGACCGCATTTGATGATGTCTGCGCTAATGAGGCGAAGGCGTGG | 75/76 (99%) |
| 13 | CP029531.1 | 1089062-1089137 | ATCTCTCGCCGCGGGAAAGCTCCTTCGGTGGCACCATCGTGATGAGAGTATCCGAGACGCGCACGGCGGAGAGAAG | 71/76 (93%) |
| 14 | CP029533.1 | 1519552-1519627 | CGCATCATCTCTGCGGAAAAGGGCCGAGGAAGTTTACGAAGAGGACGCTGAACGCATGTGCCCGATTCGAACCGGC | 75/76 (99%) |
| 15 | LR812654.1 | 1842955-1843029 | TGTTCTCGTCACCAGCGTCGACGCCATCTTCACGGATCGCCACAAATGCATCGACGAGGGCGGCCATACCGGCGTC | 74/76 (97%) |
| 16 | LR812655 | 707150-707226 | CTTGCTCAGATGCCGTTTAGCGCATGAATGTTTTTTTTTGTTCGCTTTCCTCCACCACCTTTTTTTAACCTGTGTC | 76/77 (99%) |
| 17 | CP029534.1 | 1858570-1858645 | ATACTAAGTTCTAGCAAGCTCCCTCTTTCTTTCCATTGTTTTTACGTTTGTGATTGCCTTTTTTTTATATTTGCAC | 76/76 (100%) |
| 18 | CP029534.1 | 1796176-1796246 | GCACGGGCAAGTAAGAGTGCAGGAAATCCACGTTGCAATCTGCCCCATAACGGCGAAGGCGCACCGCGACCAGATC | 71/76 (93%) |
| 19 | CP029531.1 | 825873-825948 | AAAAAAACAAGCGGCAAGCATAGGAGCGGAAGAAAGAAACCAGAGCGCTGCAACATACCAGCGCGATCTCAGGAAG | 75/76 (99%) |

| 20 | CP029531.1 | 941138-941213 | GCGATTCACCCTCCCCGGTGATGTGGTGAATTCGGATGTGGTGACGTGGGATTATGTCAGTGAAGAGCTCGCGTTG | 73/76 (96%) |
| --- | --- | --- | --- | --- |
